# Supplementary material for: Controlled crystal facet of MAPbI3 perovskite for highly efficient and stable solar cell via nucleation modulation
Source: Royal Society of Chemistry journal article supplement (doi:10.1039/c8nr08344d), 2018-12-03
Supplement: c8nr08344d1.pdf [file c8nr08344d1.pdf]

## Supporting Information

### **Controlled crystal facet of MAPbI<sub>3</sub> perovskite for highly efficient and stable solar cell via nucleation modulation**

Yongchao Ma,<sup>a,b</sup> Pesi Mwitumwa Hango,<sup>a</sup> Woon Ik Park,<sup>b,c</sup> Jae-Hong Lim,<sup>b,d</sup> Yun Kyung

Jung,<sup>e</sup> Jung Hyun Jeong,<sup>a</sup> Sung Heum Park,<sup>\*a, b</sup> and Kwang Ho Kim<sup>\*b</sup>

<sup>a</sup>Department of Physics, Pukyong National University, Busan, 48513, South Korea

<sup>b</sup>Hybrid Interface Materials Global Frontier Research Group, Pusan National University, Busan 46241, South Korea

<sup>c</sup>Electronic Convergence Materials Division, Korea Institute of Ceramic Engineering & Technology (KICET) 101 Soho-ro, Jinju 52851, South Korea

<sup>d</sup>Electrochemistry Department, Korea Institute of Materials Science, 797 Changwondaero, Changwon, Gyeongnam, 51508, South Korea

<sup>e</sup>School of Biomedical Engineering, Inje University, Inje-ro 197, Gimhae, Gyeongnam 50834, South Korea

#### AUTHOR INFORMATION

#### **Corresponding Authors**

\*E-mail: spark@pknu.ac.kr, kwhokim@pusan.ac.kr

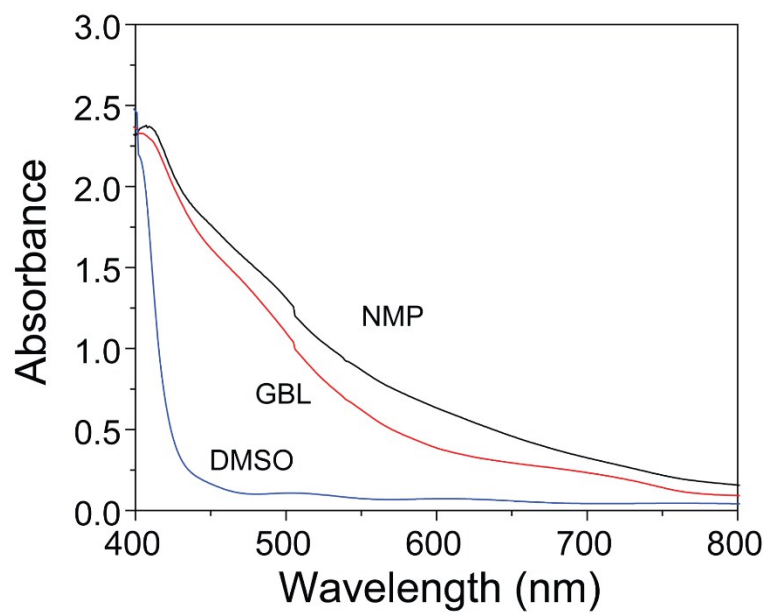

**Fig. S1** UV-vis spectroscopy of the films prepared with DMSO, GBL and NMP solvent

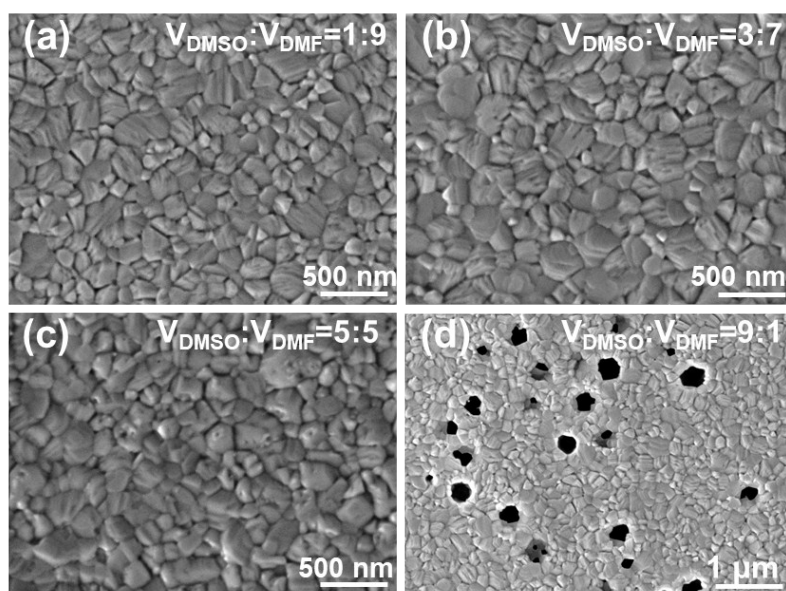

**Fig. S2** Morphology variation of the precursor films with increasing DMSO concentration in the mixed solvent prepared by conventional annealing method

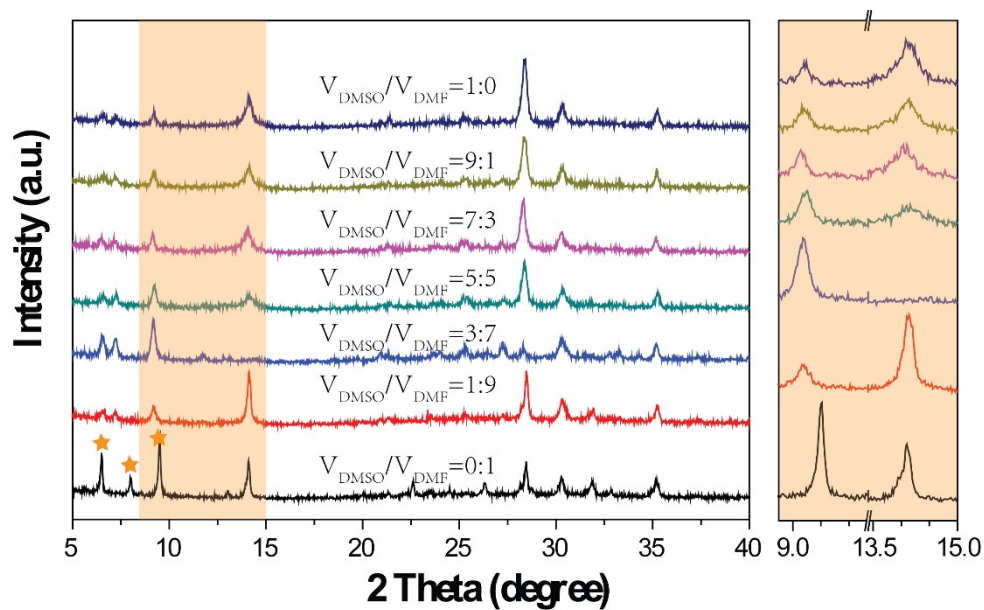

**Fig. S3** XRD patterns of the precursor films prepared with different solvent ratios of DMSO and DMF before annealing.

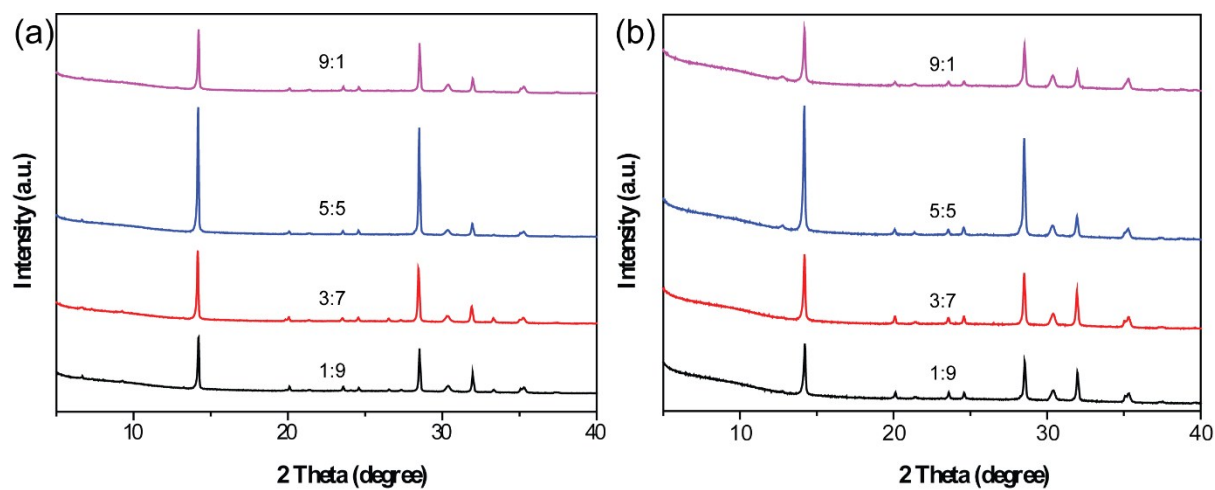

**Fig. S4** XRD patterns of the complete films prepared with different solvent ratios of DMSO and DMF annealed by (a) merged annealing and (b) conventional annealing method.

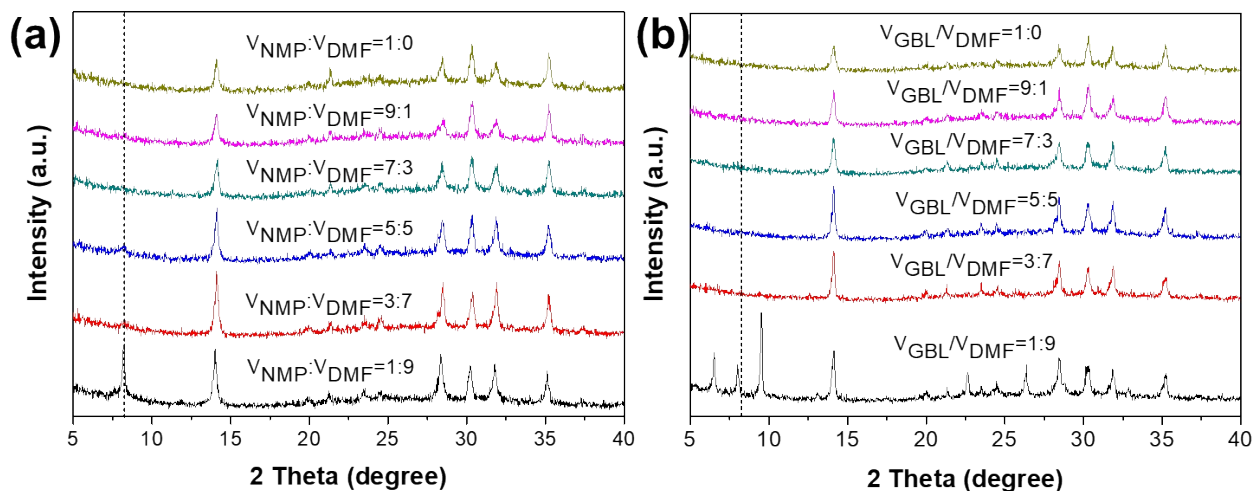

**Fig. S5** XRD patterns of the precursor films with varied mixing ratio of (a) NMP:DMF and (b) GBL:DMF.

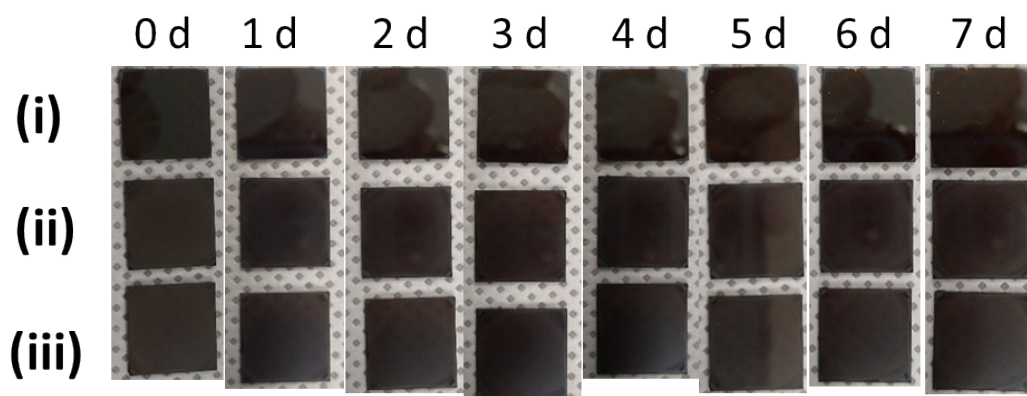

**Fig. S6** The photographs of perovskite films with increasing exposure time: (i) perovskite grains with high grain orientation, (ii) perovskite grains with small grain orientation and large grain size, and (iii) perovskite grains with high grain orientation and large grain size, respectively.

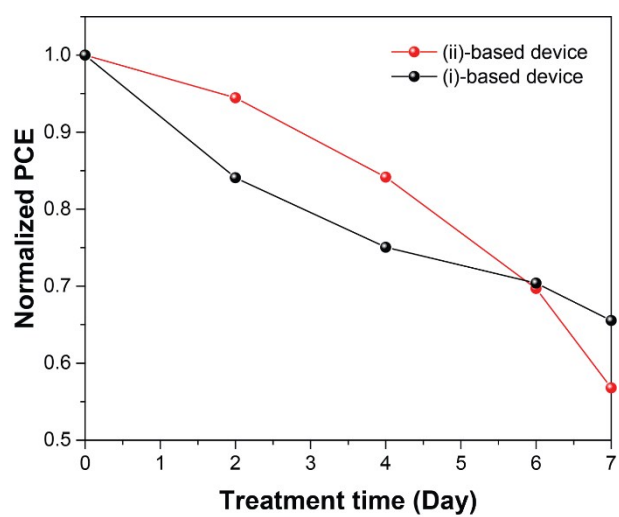

**Fig. S7** Photovoltaic performance for the typical devices as a function of time: (i) perovskite grains with high grain orientation, (ii) perovskite grains with small grain orientation and large grain size.
